# Supplementary material for: Synthesis of Tin-Doped Three-Dimensional Flower-like Bismuth Tungstate with Enhanced Photocatalytic Activity
Source: MDPI journal article supplement (doi:10.3390/ijms23158422), 2022-07-29
Supplement: s1 [file s1]

## Article

# Synthesis of Tin-Doped Three-Dimensional Flower-like Bismuth Tungstate with Enhanced Photocatalytic Activity

Xiaodong Zhu <sup>1</sup>, Fengqiu Qin <sup>1</sup>, Xiuping Zhang <sup>1</sup>, Yuanyuan Zhong <sup>1</sup>, Juan Wang <sup>1</sup>, Yu Jiao <sup>2,\*</sup>, Yuhao Luo <sup>3</sup> and Wei Feng <sup>1,\*</sup>

<sup>1</sup> School of Mechanical Engineering, Chengdu University, Chengdu 610106, China; mysuimeiren@163.com (F.Q.); 18781235109@163.com (X.Z.); suzyy605@163.com (Y.Z.); wangjuan9760@163.com (J.W.)

<sup>2</sup> School of Science, Xichang University, Xichang 615013, China

<sup>3</sup> College of Materials and Chemistry & Chemical Engineering, Chengdu University of Technology, Chengdu 610051, China; lyh1609460550@163.com

\* Correspondence: jiaoyu@xcc.edu.cn (Y.J.); fengwei@cdu.edu.cn (W.F.)

**Citation:** Zhu, X.; Qin, F.; Zhang, X.; Zhong, Y.; Wang, J.; Jiao, Y.; Luo, Y.; Feng, W. Synthesis of Tin-Doped Three-Dimensional Flower-like Bismuth Tungstate with Enhanced Photocatalytic Activity. *Int. J. Mol. Sci.* **2022**, *23*, 8422. <https://doi.org/10.3390/ijms23158422>

Academic Editor: Andrea Salis

Received: 22 June 2022

Accepted: 27 July 2022

Published: 29 July 2022

**Publisher's Note:** MDPI stays neutral with regard to jurisdictional claims in published maps and institutional affiliations.

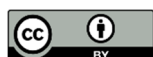

**Copyright:** © 2022 by the authors. Licensee MDPI, Basel, Switzerland. This article is an open access article distributed under the terms and conditions of the Creative Commons Attribution (CC BY) license (<https://creativecommons.org/licenses/by/4.0/>).

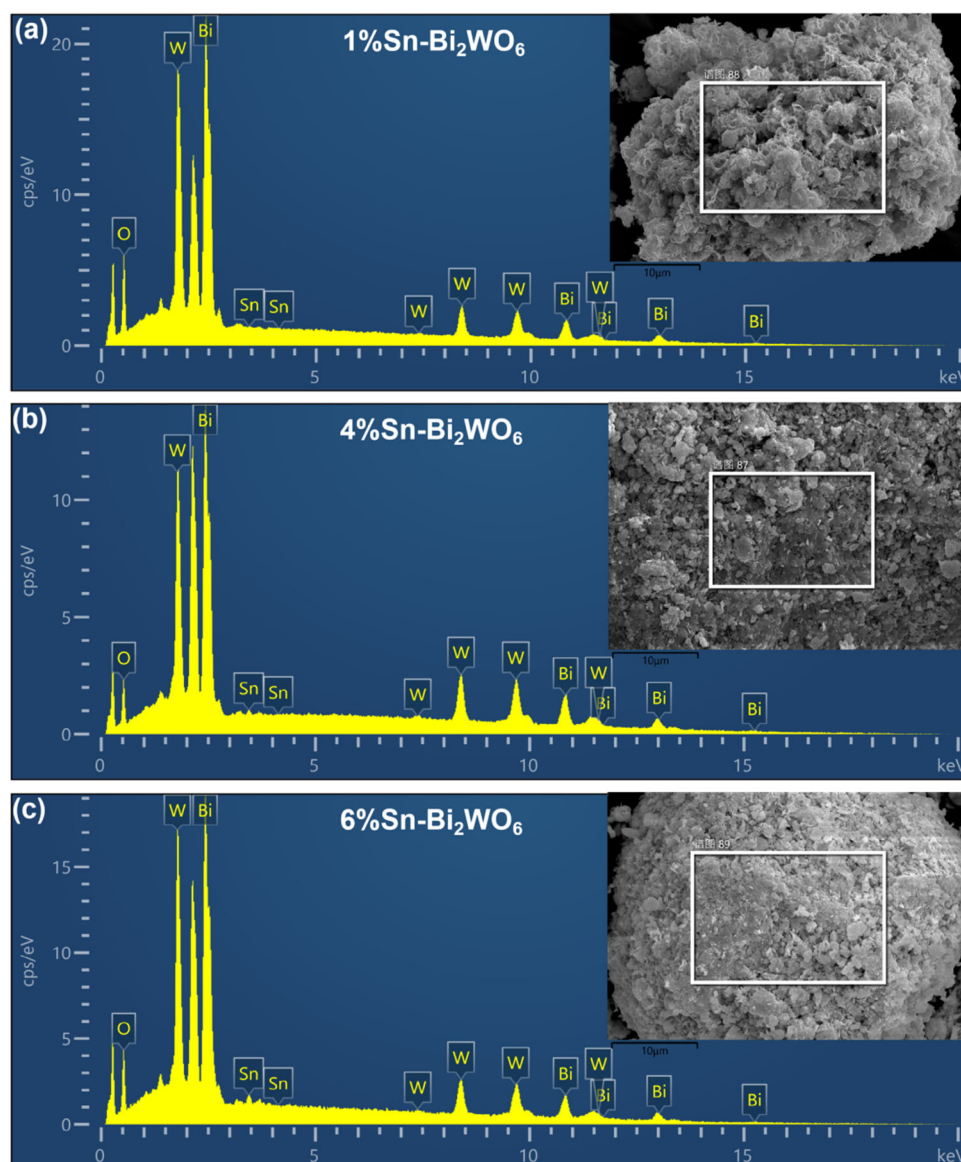

**Figure S1.** EDS analysis of 1%Sn-Bi<sub>2</sub>WO<sub>6</sub> (a), 4%Sn-Bi<sub>2</sub>WO<sub>6</sub> (b) and 6%Sn-Bi<sub>2</sub>WO<sub>6</sub> (c).

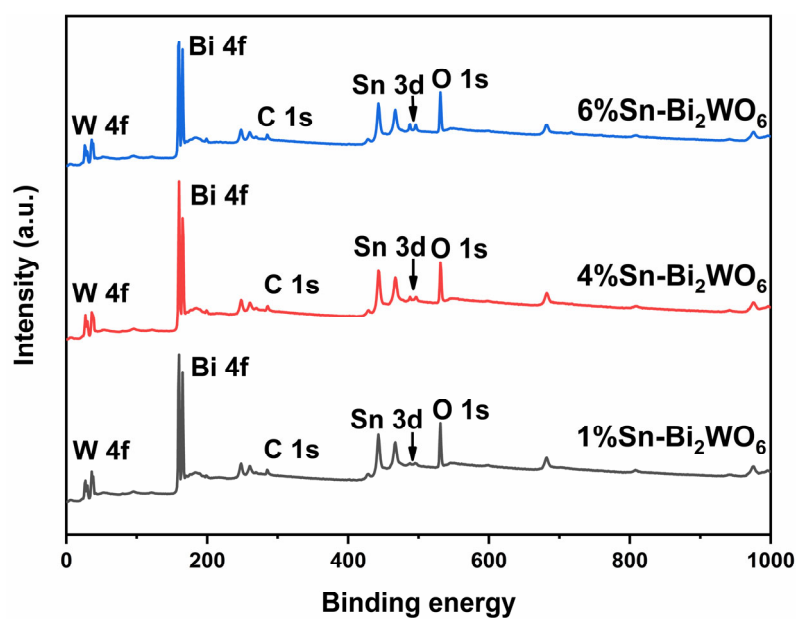

**Figure S2.** XPS survey spectra of 1%Sn- $\text{Bi}_2\text{WO}_6$ , 4%Sn- $\text{Bi}_2\text{WO}_6$  and 6%Sn- $\text{Bi}_2\text{WO}_6$ .
